# Supplementary material
Source: Research Square preprint supplement (doi:10.21203/rs.3.rs-9396986/v1)
Supplement: Supplementary file 1 [file 42f349544577b16065cbc360.docx]

**APPENDIX**

**Appendix 1. Detailed Search Strategy**

A systematic literature search was conducted to identify studies evaluating risk stratification tools for low-risk chest pain in the emergency department (ED). The following databases were searched: **PubMed/MEDLINE, Embase, Scopus, and the Cochrane Library**, covering studies published from January 2000 to March 2025.

The search strategy combined controlled vocabulary (MeSH terms) and free-text keywords. The primary PubMed search string was:

("chest pain" OR "acute chest pain" OR "suspected acute coronary syndrome")
AND ("HEART score" OR "HEART pathway" OR "EDACS" OR "TIMI score")
AND ("major adverse cardiac events" OR "MACE" OR "mortality" OR "myocardial infarction")
AND ("emergency department" OR "ED" OR "acute care")

Filters applied:

- Humans
- Adults (≥18 years)
- English language

The search strategy was adapted appropriately for each database. In addition, reference lists of included studies and relevant systematic reviews were manually screened to identify additional eligible studies.

**Appendix 2. Study Selection and PRISMA Flow Summary**

A total of **3,847 records** were identified through database searching (PubMed/MEDLINE, Embase, and Cochrane CENTRAL). After the removal of **1,233 duplicates**, **2,614 records** remained for title and abstract screening.

Following screening:

- **2,327 records were excluded** based on irrelevance
- **287 full-text articles** were assessed for eligibility

Of these:

- **204 studies were excluded** due to lack of MACE reporting, inappropriate population, absence of validated risk stratification tools, or insufficient outcome data
- **83 studies (72 primary studies and 11 additional records identified through reference screening)** were included in the final qualitative synthesis

The study selection process adhered to **PRISMA 2020 guidelines** and is presented in **Figure 1 (PRISMA Flow Diagram)**.

**Appendix 3. Characteristics of Included Studies**

The final analysis included **83 studies (72 primary + 11 additional)** comprising observational cohorts, randomized controlled trials, and validation studies conducted across North America, Europe, and Australasia.

Key characteristics:

- Sample sizes ranged from approximately **500 to >10,000 patients**
- All studies evaluated ED patients presenting with **suspected acute coronary syndrome (ACS)**
- Risk stratification tools assessed included:
  - **HEART score**
  - **HEART Pathway**
  - **EDACS / EDACS-ADP**
  - **TIMI score**

Follow-up duration was consistently **30 days**, with outcomes focused on MACE events.

**Appendix 4. Data Extraction Framework**

Data extraction was performed using a standardized template. The following variables were collected:

- Study identification (author, year, country)
- Study design (prospective, retrospective, randomized trial)
- Sample size
- Risk stratification tool used
- Definition of low-risk group (e.g., HEART ≤3, EDACS low-risk criteria)
- Troponin assay type (conventional vs. high-sensitivity)
- Reported 30-day MACE rate (%)
- Components of MACE (mortality, myocardial infarction, revascularization)

Data accuracy was verified through cross-checking.

**Appendix 5. Risk of Bias Assessment**

Risk of bias for included observational studies was assessed using the **Newcastle-Ottawa Scale (NOS)**. Studies were evaluated across three domains:

1. Selection of participants
2. Comparability of study groups
3. Outcome assessment

Most included studies demonstrated **moderate to high methodological quality**, with common limitations including:

- Retrospective design in some studies
- Variation in outcome definitions
- Potential selection bias in single-center studies

**Appendix 6. Definition of Low-Risk Chest Pain**

Across included studies, "low-risk" chest pain was defined using validated clinical tools:

- **HEART score ≤3**
- **HEART Pathway negative classification**
- **EDACS low-risk classification with negative troponin**
- **TIMI score 0–1 (less consistently reliable)**

It is important to note that definitions were not entirely uniform across studies, contributing to heterogeneity in outcome reporting.

**Appendix 7. Definition of Outcomes (MACE)**

The primary outcome was **30-day major adverse cardiac events (MACE)**, defined as a composite of:

- All-cause mortality
- Acute myocardial infarction
- Urgent coronary revascularization (PCI or CABG)

Some studies included additional outcomes such as unstable angina requiring hospitalization. Variations in definitions were documented and considered in the synthesis.

**Appendix 8. Summary of Key Findings by Risk Tool**

**HEART Score / HEART Pathway**

- MACE rates ranged from approximately **0.9% to 1.9%**
- Borderline scores (HEART = 3) demonstrated higher risk in some studies

**EDACS / EDACS-ADP**

- MACE rates ranged from approximately **0.3% to 1.2%**
- Demonstrated higher sensitivity but broader low-risk classification

**TIMI Score**

- Less reliable for identifying truly low-risk patients
- Higher miss rates compared to HEART and EDACS

**Appendix 9. Analytical Approach**

Due to heterogeneity in study designs, definitions of low-risk populations, and outcome reporting, a **narrative synthesis approach** was employed. Meta-analysis was not conducted due to:

- Variability in MACE definitions
- Differences in risk tool thresholds
- Inconsistent reporting of outcomes

Findings were stratified by risk stratification tool to allow structured comparison.

**Appendix 10. Study Limitations Identified Across Included Studies**

Common limitations across studies included:

- Heterogeneity in outcome definitions
- Variability in troponin assay sensitivity
- Predominance of high-income country settings
- Limited reporting of patient-centered outcomes
- Potential publication bias

These factors were considered in interpreting the findings.
